# Supplementary material for: Construction of a label-free electrochemical immunosensor based on a Co9S8/Co3C@C dual-heterojunction for the detection of diethylstilbestrol
Source: Royal Society of Chemistry journal article supplement (doi:10.1039/d3nj03507g), 2023-01-01
Supplement: d3nj03507g1.pdf [file d3nj03507g1.pdf]

## Supporting Information

### **Construction of a label-free electrochemical immunosensor based on Co<sub>9</sub>S<sub>8</sub>/Co<sub>3</sub>C@C dual-heterojunction for the detection of diethylstilbestrol**

Xin Wen, Yangyang Wang, Jianjun Ding, Xiaojing Dong, Yiqiang Sun and Bo Xu\*

School of Chemistry and Chemical Engineering, University of Jinan, Shandong,  
Jinan, 250022, China

---

\*Corresponding author.

E-mail address: [chm\\_xub@ujn.edu.cn](mailto:chm_xub@ujn.edu.cn) (B. Xu).

## ***Reagents***

The glassy carbon electrode (GCE) was acquired from Xuzhou Xinke Instrument Co. Ltd., China. The silver/silver chloride electrode (Ag/AgCl) and platinum electrode (Pt) were gained from Wuhan Gauss Union Co. Ltd., China. Prostate-specific antigen (PSA), carcinoembryonic antigen (CEA), alpha-fetoprotein (AFP), serum components (glucose, dopamine, and ascorbic acid), diethylstilbestrol (DES) antigen and DES antibody were collected from Saiao Biotechnology Co. Ltd., (Shanghai, China). Thioglycollic acid (TGA) were obtained from Sinopharm Chemical Reagent Co. Ltd., (Shanghai, China). Bovine albumin (BSA), 1-ethyl-3-(3-dimethylaminopropyl) carbodiimide hydrochloride (EDC) and N-hydroxysuccinimide (NHS) were obtained from Aladdin Reagent Database Inc. (Shanghai, China). Cobalt(II) nitrate hexahydrate  $\text{Co}(\text{NO}_3)_2 \cdot 6\text{H}_2\text{O}$  and dimethylimidazole were also purchased from Aladdin Reagent Co., Ltd.  $\text{Na}_2\text{S} \cdot 9\text{H}_2\text{O}$  was obtained from Shanghai McLean Biochemical Technology Co., Ltd.

## ***Apparatuses***

All pelectrochemical measurements and electrochemical impedance spectroscopy (EIS) analysis were performed on a CHI760D electrochemical workstation (Chenhua Instrument Shanghai Co., Ltd., China). Transmission electron micrographs (TEM) were measured on an H-800 microscope (Hitachi, Japan). X-ray diffraction (XRD) patterns were obtained by using D8 focus diffractometer (Bruker AXS, Germany). The Tecnai G2 F20 microscope (America) has been employed to perform high-resolution transmission electron microscopy (HRTEM) and energy dispersive X-ray spectroscopy (EDS). And the ESCALAB 250XI detected the X-ray photoelectron spectroscopy (XPS).

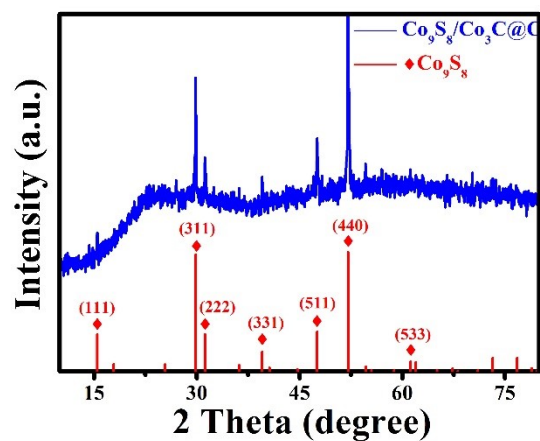

Figure S1 XRD patterns of synthesized  $\text{Co}_9\text{S}_8/\text{Co}_3\text{C}@C$

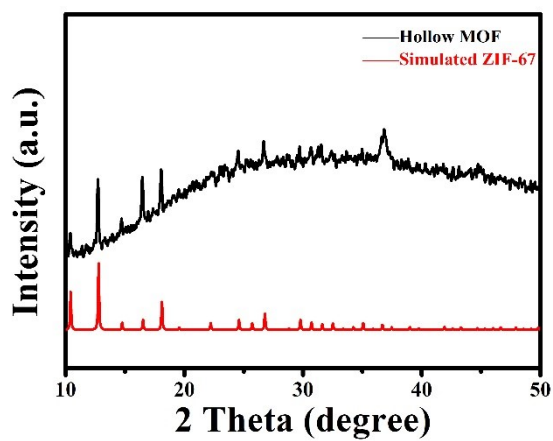

Figure S2 XRD result of hollow MOF.

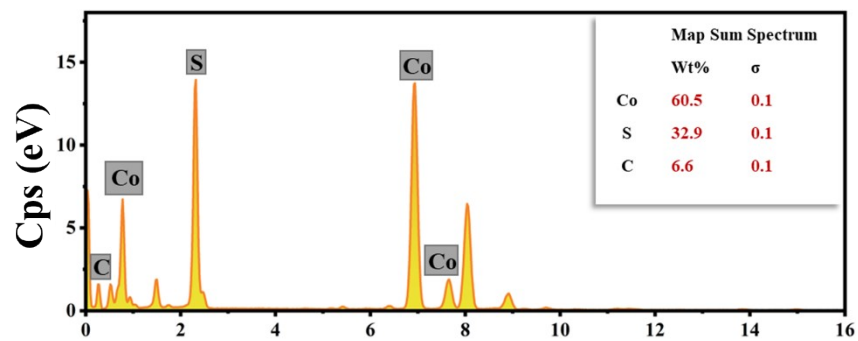

**Figure S3** HAADF-STEM image and corresponding elemental mappings.

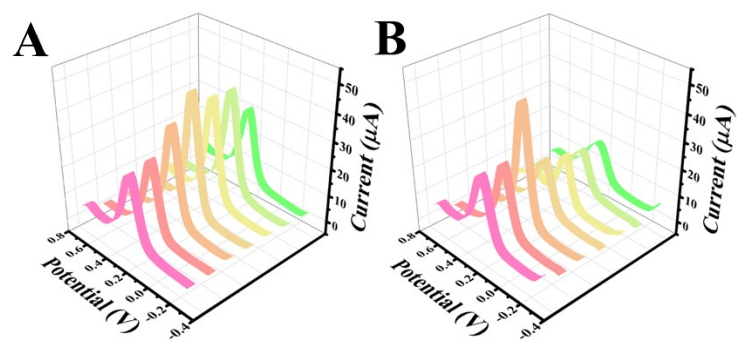

**Figure S4** Optimization of experimental conditions with (A) Co<sub>9</sub>S<sub>8</sub>/Co<sub>3</sub>C@C and (B) pH on the response of the immunosensor to 1.2 ng/mL DES.

**Table S1** Simulation parameters of the equivalent circuit components.

| Electrode         | $R_s, \Omega$ | $R_{ct}, \Omega$ | $C_{dl}, F$            | Warburg, $Y_o, S \cdot sec^5$ |
|-------------------|---------------|------------------|------------------------|-------------------------------|
| GCE               | 55.81         | 116              | $5.603 \times 10^{-6}$ | 0.0001881                     |
| GCE/CC            | 33            | 567.7            | $5.725 \times 10^{-6}$ | 0.001624                      |
| GCE/CC/Ab         | 38.14         | 1175             | $4.908 \times 10^{-6}$ | 0.0008404                     |
| GCE/CC/Ab/BSA     | 58.47         | 1734             | $4.71 \times 10^{-6}$  | 0.0005067                     |
| GCE/CC/Ab/BSA/DES | 45.92         | 2000             | $4.456 \times 10^{-6}$ | 0.0003183                     |

**Table S2** The developed immunosensors for detecting DES compared to other published immunosensor.

| Materials                       | Detection method                  | Linear range (ng/mL)       | LOD (fg/mL)        | Reference |
|---------------------------------|-----------------------------------|----------------------------|--------------------|-----------|
| MIP-CdSe/CdS/ZnS QDs            | Fluorescence                      | $50 \sim 2 \times 10^4$    | $4 \times 10^3$    | [1]       |
| $Cu_3(BTC)_2$ -Ag NPs           | Electrochemical immunosensor      | 500~5000                   | $1.67 \times 10^3$ | [2]       |
| AuNPs                           | Competitive immunoassay           | 16~500                     | $1.3 \times 10^7$  | [3]       |
| Au/UiO-66(NH <sub>2</sub> )/CdS | Photoelectrochemical immunosensor | $1 \times 10^{-4} \sim 20$ | 60                 | [4]       |
| CdTe NC/rGO                     | Electrochemiluminescence          | 0.002~2                    | $1 \times 10^3$    | [5]       |
| DIB-Cl                          | HPLC-FLD                          | 1.5~300                    | $5 \times 10^5$    | [6]       |
| This work                       | Electrochemical immunosensor      | 0.000384~6                 | 3.24               |           |

**Table S3** Reproducibility result of the immunoassay for 1.2 pg/mL of  
DES.

| Methods | Found<br>(ng/mL)                     | Average<br>(ng/mL) | RSD<br>(n = 5, %) | Variance<br>( $s^2$ ) |
|---------|--------------------------------------|--------------------|-------------------|-----------------------|
| DPV     | 47.40, 47.00, 48.75,<br>49.68, 48.39 | 48.24              | 2.22              | 0.92                  |

The results were showed in Table S3, and the RSD of the method is less than 5.0%. The results implied that the variance of the DPV method results performed a good degree of precision and indicating the system error can be ignored.

## References

- [1] Zhang R-r, Li X-j, Sun A-l, Food Control, 2022, **132**, 108438
- [2] Li X, Miao J, Li Y, ACS Applied Nano Materials, 2019, **2**, 8043-8050
- [3] Liu X, Hu Y, Sheng X, Sensors and Actuators B: Chemical, 2017, **247**, 245-253
- [4] Wu T, Yan T, Zhang X, Biosensors and Bioelectronics, 2018, **117**, 575-582
- [5] Shan Y, Zhang H-L, Zhu Y, ACS Applied Nano Materials, 2020, **3**, 4670-4680
- [6] Chen P, Sun H, Wang X, Analytical Methods, 2012, **4**, 4049-4052
